# Supplementary material for: A distributional reinforcement learning model for optimal glucose control after cardiac surgery
Source: Springer Nature journal article supplement (doi:10.1038/s41746-025-01709-9), 2025-05-27
Supplement: MOESM1 [file 41746_2025_1709_MOESM1_ESM.pdf]

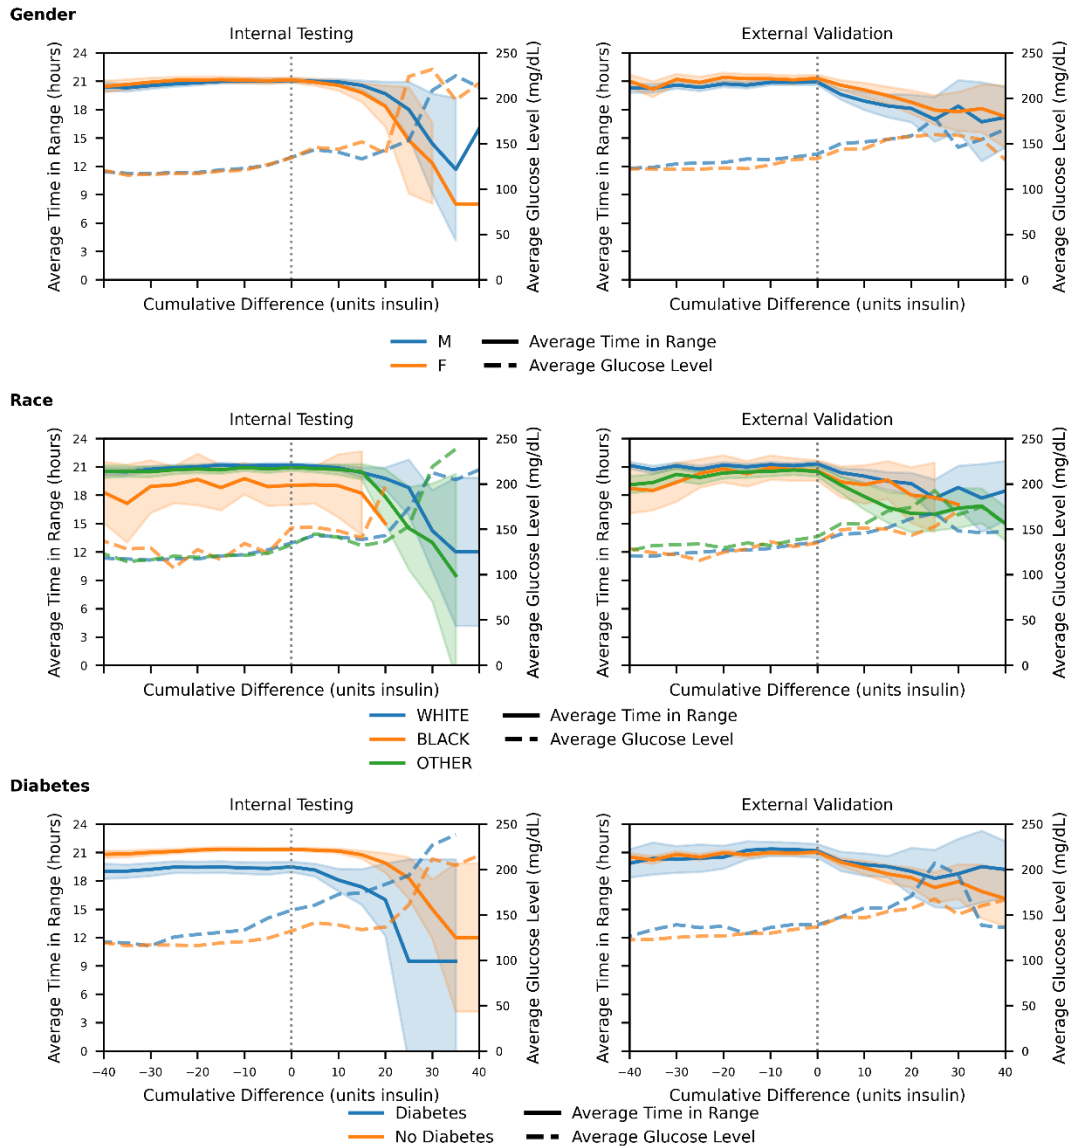

**Supplementary Figure 1. Time in range analysis stratified by subgroup.** Average time in range  $\pm$  the standard error of the mean shown via solid lines. Dashed lines indicate the average glucose level corresponding to that subgroup.

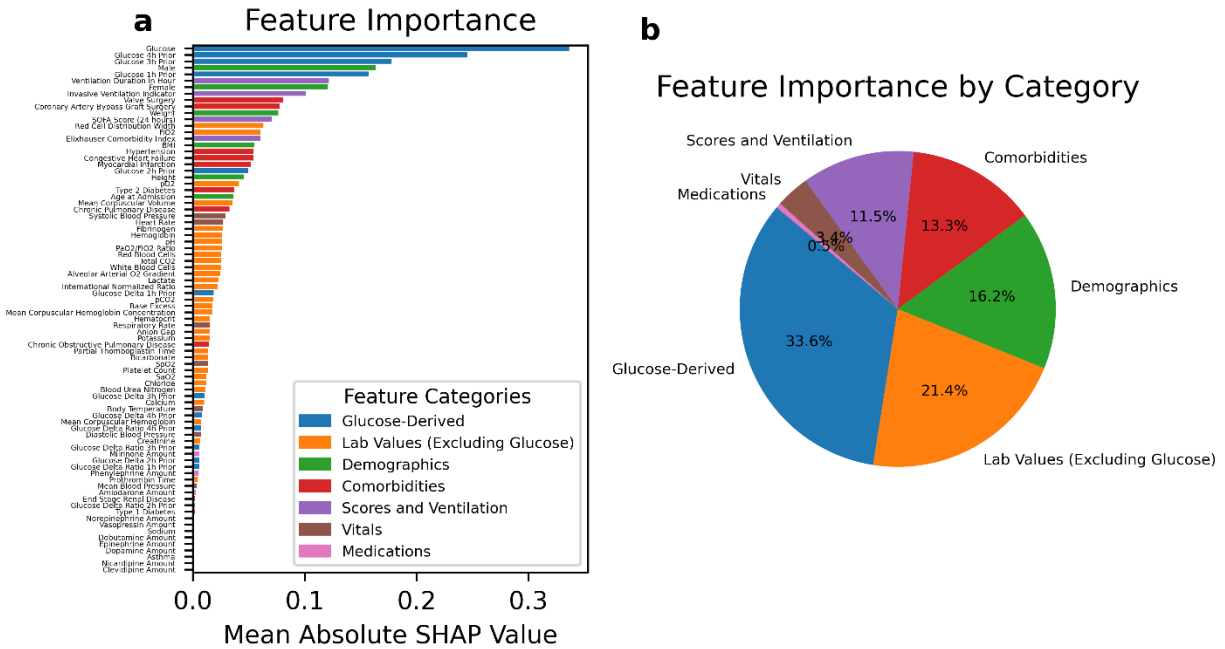

**Supplementary Figure 2. Feature importances for GLUOCSE. a)** Ranked feature importances by mean absolute SHAP value. **b)** Relative contributions of varying categorizations of features.

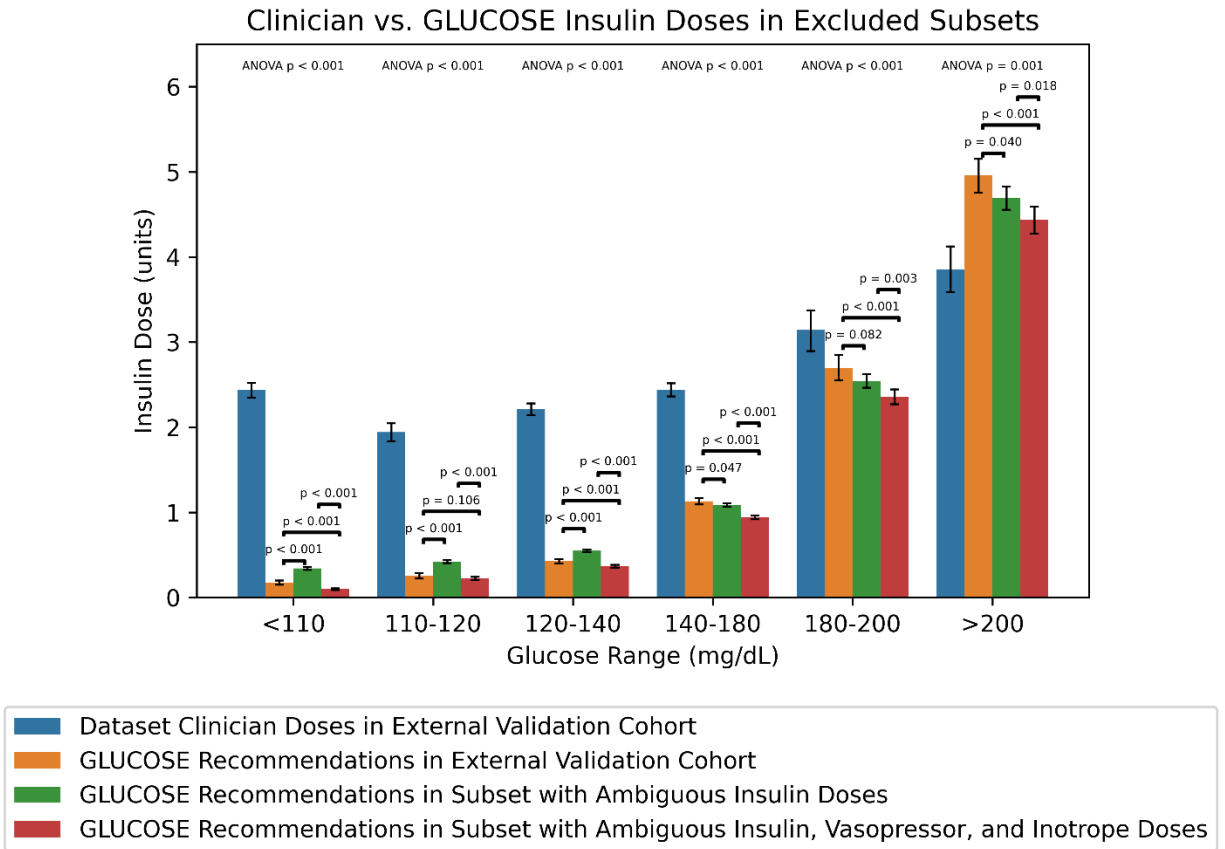

**Supplementary Figure 3. Analysis of GLUCOSE predictions in excluded subsets.** Average insulin values in varying clinically relevant ranges are shown in each of the subsets. 95% confidence intervals are shown for each bar.

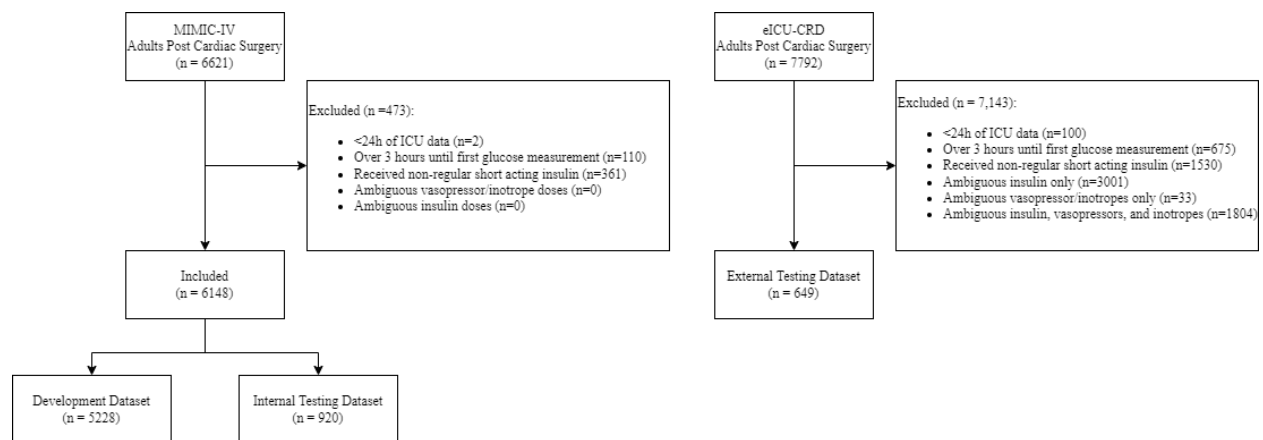

**Supplementary Figure 4. CONSORT diagram.** Inclusion/exclusion criteria applied during data preprocessing.

**Supplementary Table 1. Baseline population characteristics.** Characteristics of all patients used in the primary analysis across demographic information, vitals, laboratory data, scores, and medications.

|                                              |                 | Development Cohort  | External Validation Cohort | P-Value |
|----------------------------------------------|-----------------|---------------------|----------------------------|---------|
| Admission Age, median [Q1, Q3]               |                 | 68.0 [61.0,76.0]    | 67.0 [60.0,75.0]           | 0.093   |
| Gender, n (%)                                | Female          | 1746 (28.4)         | 213 (32.8)                 | 0.02    |
|                                              | Male            | 4402 (71.6)         | 436 (67.2)                 |         |
| Race, n (%)                                  | Asian           | 136 (2.2)           | 15 (2.3)                   | <0.001  |
|                                              | Black           | 222 (3.6)           | 51 (7.9)                   |         |
|                                              | Hispanic        | 175 (2.8)           | 79 (12.2)                  |         |
|                                              | Native American | 11 (0.2)            |                            |         |
|                                              | Other           | 219 (3.6)           |                            |         |
|                                              | Unknown         | 841 (13.7)          | 72 (11.1)                  |         |
|                                              | White           | 4544 (73.9)         | 432 (66.6)                 |         |
| Height, median [Q1,Q3]                       |                 | 173.0 [165.0,178.0] | 170.2 [162.6,177.8]        | 0.059   |
| Weight, median [Q1,Q3]                       |                 | 83.2 [72.0,96.0]    | 85.6 [72.6,99.7]           | 0.005   |
| BMI, median [Q1,Q3]                          |                 | 28.2 [25.1,32.1]    | 29.2 [25.8,33.9]           | <0.001  |
| Type 1 Diabetes, n (%)                       |                 | 33 (0.5)            | 2 (0.3)                    | 0.77    |
| Type 2 Diabetes, n (%)                       |                 | 868 (14.1)          | 59 (9.1)                   | <0.001  |
| Hypertension, n (%)                          |                 | 3814 (62.0)         | 177 (27.3)                 | <0.001  |
| End Stage Renal Disease, n (%)               |                 | 131 (2.1)           | 17 (2.6)                   | 0.503   |
| Chronic Obstructive Pulmonary Disease, n (%) |                 | 297 (4.8)           | 65 (10.0)                  | <0.001  |
| Chronic Pulmonary Disease, n (%)             |                 | 1036 (16.9)         | 40 (6.2)                   | <0.001  |
| Asthma, n (%)                                |                 | 1 (0.0)             | 29 (4.5)                   | <0.001  |
| History of Myocardial Infarct, n (%)         |                 | 1782 (29.0)         | 56 (8.6)                   | <0.001  |
| Congestive Heart Failure, n (%)              |                 | 1665 (27.1)         | 52 (8.0)                   | <0.001  |
| SaO2, median [Q1,Q3]                         |                 | 97.0 [96.0,98.0]    | 98.0 [96.0,99.0]           | <0.001  |
| pO2, median [Q1,Q3]                          |                 | 174.0 [113.0,300.0] | 111.0 [86.0,153.0]         | <0.001  |
| pCO2, median [Q1,Q3]                         |                 | 40.0 [36.0,44.0]    | 40.4 [36.4,44.8]           | 0.527   |
| FIO2, median [Q1,Q3]                         |                 | 50.0 [50.0,80.0]    | 50.0 [40.0,60.0]           | <0.001  |
| AaDO2, median [Q1,Q3]                        |                 | 200.8 [133.5,323.0] | 168.8 [125.2,269.2]        | <0.001  |
| paO2 FIO2 ratio, median [Q1,Q3]              |                 | 244.1 [180.0,322.5] | 230.2 [171.0,304.1]        | <0.001  |
| pH, median [Q1,Q3]                           |                 | 7.4 [7.3,7.4]       | 7.4 [7.4,7.4]              | <0.001  |
| Base Excess, median [Q1,Q3]                  |                 | -1.0 [-3.0,0.0]     | -2.0 [-4.0,0.0]            | <0.001  |
| Bicarbonate, median [Q1,Q3]                  |                 | 23.0 [22.0,25.0]    | 24.0 [22.0,25.0]           | <0.001  |
| Total CO2, median [Q1,Q3]                    |                 | 25.0 [23.0,26.0]    | 24.2 [22.0,26.0]           | 0.265   |
| Hematocrit, median [Q1,Q3]                   |                 | 29.8 [26.8,32.9]    | 29.3 [26.0,33.0]           | 0.013   |
| Hemoglobin, median [Q1,Q3]                   |                 | 10.0 [8.9,11.1]     | 9.9 [8.8,11.1]             | 0.094   |
| Chloride, median [Q1,Q3]                     |                 | 107.0 [105.0,110.0] | 109.0 [107.0,112.0]        | <0.001  |
| Calcium, median [Q1,Q3]                      |                 | 8.2 [7.9,8.5]       | 8.1 [7.7,8.5]              | <0.001  |
| Temperature, median [Q1,Q3]                  |                 | 36.8 [36.3,37.2]    | 37.1 [36.7,37.5]           | <0.001  |
| Potassium, median [Q1,Q3]                    |                 | 4.4 [4.1,4.7]       | 4.2 [3.9,4.5]              | <0.001  |

|                                               |   |                     |                     |        |
|-----------------------------------------------|---|---------------------|---------------------|--------|
| Sodium, median [Q1,Q3]                        |   | 138.0 [137.0,140.0] | 141.0 [138.0,143.0] | <0.001 |
| Lactate, median [Q1,Q3]                       |   | 2.0 [1.6,2.7]       | 2.1 [1.7,2.6]       | <0.001 |
| Glucose, median [Q1,Q3]                       |   | 124.0 [108.0,145.0] | 130.0 [113.0,150.0] | <0.001 |
| WBC, median [Q1,Q3]                           |   | 13.1 [10.4,16.9]    | 13.1 [10.7,16.7]    | 0.071  |
| MCH, median [Q1,Q3]                           |   | 30.5 [29.3,31.6]    | 30.0 [28.9,31.1]    | <0.001 |
| MCHC, median [Q1,Q3]                          |   | 33.7 [32.8,34.6]    | 33.6 [32.9,34.1]    | <0.001 |
| MCV, median [Q1,Q3]                           |   | 90.0 [87.0,93.0]    | 89.4 [86.1,92.7]    | <0.001 |
| Platelets, median [Q1,Q3]                     |   | 144.0 [116.0,179.0] | 144.0 [113.0,181.0] | 0.668  |
| RBC, median [Q1,Q3]                           |   | 3.3 [2.9,3.7]       | 3.3 [3.0,3.8]       | <0.001 |
| RDW, median [Q1,Q3]                           |   | 13.7 [13.0,14.7]    | 14.2 [13.5,15.4]    | <0.001 |
| Anion Gap, median [Q1,Q3]                     |   | 11.0 [10.0,13.0]    | 8.0 [6.0,10.0]      | <0.001 |
| BUN, median [Q1,Q3]                           |   | 16.0 [13.0,20.0]    | 17.0 [13.0,22.0]    | <0.001 |
| Creatinine, median [Q1,Q3]                    |   | 0.9 [0.7,1.1]       | 1.0 [0.8,1.2]       | <0.001 |
| Fibrinogen, median [Q1,Q3]                    |   | 201.0 [167.0,246.0] | 210.0 [173.0,270.0] | 0.109  |
| INR, median [Q1,Q3]                           |   | 1.3 [1.2,1.4]       | 1.2 [1.1,1.4]       | <0.001 |
| PT, median [Q1,Q3]                            |   | 14.2 [13.1,15.7]    | 13.4 [12.1,16.1]    | <0.001 |
| PTT, median [Q1,Q3]                           |   | 30.3 [27.4,34.9]    | 31.7 [28.4,35.3]    | 0.001  |
| Heart Rate, median [Q1,Q3]                    |   | 81.0 [75.0,89.0]    | 86.0 [77.0,93.0]    | <0.001 |
| SBP, median [Q1,Q3]                           |   | 111.0 [101.0,121.0] | 115.0 [104.0,128.0] | <0.001 |
| DBP, median [Q1,Q3]                           |   | 56.0 [50.0,62.7]    | 55.0 [49.0,62.0]    | <0.001 |
| MBP, median [Q1,Q3]                           |   | 73.0 [66.0,80.0]    | 74.0 [67.0,81.0]    | <0.001 |
| Respiratory Rate, median [Q1,Q3]              |   | 17.0 [14.0,20.0]    | 18.0 [14.0,22.0]    | <0.001 |
| SpO2, median [Q1,Q3]                          |   | 99.0 [96.0,100.0]   | 98.0 [96.0,100.0]   | <0.001 |
| 24h SOFA Score, median [Q1,Q3]                |   | 5.0 [3.0,7.0]       | 6.0 [4.0,8.0]       | <0.001 |
| Elixhauser, median [Q1,Q3]                    |   | 4.0 [3.0,6.0]       | 0.0 [0.0,2.0]       | <0.001 |
| Invasive Ventilation in Hour                  | 0 | 79626 (57.2)        | 1039 (7.0)          | <0.001 |
|                                               | 1 | 59623 (42.8)        | 13769 (93.0)        |        |
| Minutes on Ventilator in Hour, median [Q1,Q3] |   | 0.0 [0.0,60.0]      | 60.0 [60.0,60.0]    | <0.001 |
| Dopamine Amount, median [Q1,Q3]               |   | 0.0 [0.0,0.0]       | 0.0 [0.0,0.0]       | <0.001 |
| Epinephrine Amount, median [Q1,Q3]            |   | 0.0 [0.0,0.0]       | 0.0 [0.0,0.0]       | 0.052  |
| Norepinephrine Amount, median [Q1,Q3]         |   | 0.0 [0.0,0.0]       | 0.4 [0.0,3.5]       | <0.001 |
| Phenylephrine Amount, median [Q1,Q3]          |   | 3.7 [0.0,22.2]      | 0.0 [0.0,0.0]       | <0.001 |
| Vasopressin Amount, median [Q1,Q3]            |   | 0.0 [0.0,0.0]       | 0.0 [0.0,0.0]       | 0.199  |
| Amiodarone Amount, median [Q1,Q3]             |   | 0.0 [0.0,0.0]       | 0.0 [0.0,0.0]       | <0.001 |
| Clevidipine Amount, median [Q1,Q3]            |   | 0.0 [0.0,0.0]       | 0.0 [0.0,0.0]       | 0.329  |
| Dobutamine Amount, median [Q1,Q3]             |   | 0.0 [0.0,0.0]       | 0.0 [0.0,0.0]       | <0.001 |
| Milrinone Amount, median [Q1,Q3]              |   | 0.0 [0.0,0.0]       | 0.0 [0.0,0.0]       | 0.001  |
| Nicardipine Amount, median [Q1,Q3]            |   | 0.0 [0.0,0.0]       | 0.0 [0.0,0.0]       | <0.001 |

**Supplementary Table 2. Population characteristics of excluded external validation patients.**

Characteristics of all patients excluded from external validation due to ambiguous medication information. Information across demographic information, vitals, laboratory data, scores, and medications shown.

|                                                     |                          | Subset with Ambiguous Insulin Doses | Subset with Ambiguous Insulin, Vasopressor, and Inotrope Doses | Primary External Validation Cohort | P-Value |
|-----------------------------------------------------|--------------------------|-------------------------------------|----------------------------------------------------------------|------------------------------------|---------|
| <b>n</b>                                            |                          | 3001                                | 1804                                                           | 649                                |         |
| <b>Admission Age, mean (SD)</b>                     |                          | 67.0 (12.4)                         | 67.6 (11.5)                                                    | 67.0 (11.1)                        | 0.27    |
| <b>Gender, n (%)</b>                                | <b>Female</b>            | 992 (33.1)                          | 584 (32.4)                                                     | 213 (32.8)                         | 0.888   |
|                                                     | <b>Male</b>              | 2009 (66.9)                         | 1220 (67.6)                                                    | 436 (67.2)                         |         |
| <b>Race, n (%)</b>                                  | <b>Asian</b>             | 97 (3.2)                            | 9 (0.5)                                                        | 15 (2.3)                           | <0.001  |
|                                                     | <b>Black</b>             | 235 (7.8)                           | 43 (2.4)                                                       | 51 (7.9)                           |         |
|                                                     | <b>Hispanic</b>          | 79 (2.6)                            | 50 (2.8)                                                       | 79 (12.2)                          |         |
|                                                     | <b>Unkown</b>            | 156 (5.2)                           | 84 (4.7)                                                       | 72 (11.1)                          |         |
|                                                     | <b>White</b>             | 2434 (81.1)                         | 1618 (89.7)                                                    | 432 (66.6)                         |         |
| <b>Height, mean (SD)</b>                            |                          | 171.2 (11.6)                        | 171.7 (10.9)                                                   | 170.3 (10.2)                       | 0.029   |
| <b>Weight, mean (SD)</b>                            |                          | 86.4 (22.4)                         | 87.0 (20.4)                                                    | 87.8 (21.4)                        | 0.262   |
| <b>BMI, mean (SD)</b>                               |                          | 29.2 (6.4)                          | 29.5 (6.4)                                                     | 30.1 (6.3)                         | 0.005   |
| <b>Type 1 Diabetes, n (%)</b>                       |                          | 8 (0.3)                             | 5 (0.3)                                                        | 2 (0.3)                            | 0.983   |
| <b>Type 2 Diabetes, n (%)</b>                       |                          | 93 (3.1)                            | 22 (1.2)                                                       | 59 (9.1)                           | <0.001  |
| <b>Hypertension, n (%)</b>                          |                          | 750 (25.0)                          | 121 (6.7)                                                      | 177 (27.3)                         | <0.001  |
| <b>End Stage Renal Disease, n (%)</b>               |                          | 58 (1.9)                            | 25 (1.4)                                                       | 17 (2.6)                           | 0.111   |
| <b>Chronic Obstructive Pulmonary Disease, n (%)</b> |                          | 290 (9.7)                           | 176 (9.8)                                                      | 65 (10.0)                          | 0.962   |
| <b>Chronic Pulmonary Disease, n (%)</b>             |                          | 212 (7.1)                           | 45 (2.5)                                                       | 40 (6.2)                           | <0.001  |
| <b>Asthma, n (%)</b>                                |                          | 146 (4.9)                           | 108 (6.0)                                                      | 29 (4.5)                           | 0.161   |
| <b>History of Myocardial Infarct, n (%)</b>         |                          | 148 (4.9)                           | 98 (5.4)                                                       | 56 (8.6)                           | 0.001   |
| <b>Congestive Heart Failure, n (%)</b>              |                          | 236 (7.9)                           | 97 (5.4)                                                       | 52 (8.0)                           | 0.003   |
| <b>Glucose, mean (SD)</b>                           |                          | 132.2 (30.7)                        | 130.6 (30.5)                                                   | 134.5 (33.0)                       | <0.001  |
| <b>Hyperglycemia Step Count, n (%)</b>              | <b>Non-hyperglycemic</b> | 64715 (94.6)                        | 38877 (94.2)                                                   | 13597 (91.8)                       | <0.001  |
|                                                     | <b>Hyperglycemic</b>     | 3699 (5.4)                          | 2401 (5.8)                                                     | 1211 (8.2)                         |         |
| <b>Hypoglycemia Step Count, n (%)</b>               | <b>Non-hypoglycemic</b>  | 68221 (99.7)                        | 41123 (99.6)                                                   | 14739 (99.5)                       | <0.001  |
|                                                     | <b>Hypoglycemic</b>      | 193 (0.3)                           | 155 (0.4)                                                      | 69 (0.5)                           |         |
| <b>Glucose During Hyperglycemia, mean (SD)</b>      |                          | 210.5 (47.4)                        | 206.7 (28.4)                                                   | 209.7 (28.8)                       | 0.001   |
| <b>Glucose During Hypoglycemia, mean (SD)</b>       |                          | 60.0 (12.2)                         | 64.0 (5.2)                                                     | 60.9 (11.1)                        | 0.001   |
| <b>SaO<sub>2</sub>, median [Q1,Q3]</b>              |                          | 97.0 [96.0,99.0]                    | 97.0 [95.0,99.0]                                               | 98.0 [96.0,99.0]                   | <0.001  |
| <b>pO<sub>2</sub>, median [Q1,Q3]</b>               |                          | 109.0 [85.0,149.0]                  | 105.0 [81.0,145.0]                                             | 111.0 [86.0,153.0]                 | <0.001  |
| <b>pCO<sub>2</sub>, median [Q1,Q3]</b>              |                          | 41.0 [37.0,45.0]                    | 40.0 [36.0,44.0]                                               | 40.4 [36.4,44.8]                   | <0.001  |
| <b>FIO<sub>2</sub>, median [Q1,Q3]</b>              |                          | 40.0 [36.0,52.0]                    | 45.0 [40.0,70.0]                                               | 50.0 [40.0,60.0]                   | <0.001  |

|                                                         |   |                     |                     |                     |        |
|---------------------------------------------------------|---|---------------------|---------------------|---------------------|--------|
| AaDO <sub>2</sub> , median [Q1,Q3]                      |   | 143.0 [83.5,220.0]  | 161.7 [112.2,252.7] | 168.8 [125.2,269.2] | <0.001 |
| paO <sub>2</sub> FIO <sub>2</sub> ratio, median [Q1,Q3] |   | 262.0 [190.0,367.5] | 234.0 [172.5,316.1] | 230.2 [171.0,304.1] | <0.001 |
| pH, median [Q1,Q3]                                      |   | 7.4 [7.4,7.4]       | 7.4 [7.4,7.4]       | 7.4 [7.4,7.4]       | <0.001 |
| Base Excess, median [Q1,Q3]                             |   | -1.1 [-3.7,1.0]     | -2.1 [-4.0,0.0]     | -2.0 [-4.0,0.0]     | <0.001 |
| Bicarbonate, median [Q1,Q3]                             |   | 24.0 [22.0,25.0]    | 23.0 [21.0,25.0]    | 24.0 [22.0,25.0]    | <0.001 |
| Total CO <sub>2</sub> , median [Q1,Q3]                  |   | 24.0 [22.0,26.0]    | 24.0 [22.0,26.0]    | 24.2 [22.0,26.0]    | <0.001 |
| Hematocrit, median [Q1,Q3]                              |   | 31.0 [27.3,34.6]    | 29.7 [26.5,33.2]    | 29.3 [26.0,33.0]    | <0.001 |
| Hemoglobin, median [Q1,Q3]                              |   | 10.3 [9.1,11.6]     | 9.9 [8.8,11.1]      | 9.9 [8.8,11.1]      | <0.001 |
| Chloride, median [Q1,Q3]                                |   | 108.0 [106.0,111.0] | 109.0 [107.0,112.0] | 109.0 [107.0,112.0] | <0.001 |
| Calcium, median [Q1,Q3]                                 |   | 8.2 [7.8,8.6]       | 8.1 [7.7,8.6]       | 8.1 [7.7,8.5]       | 0.002  |
| Temperature, median [Q1,Q3]                             |   | 37.2 [36.7,37.6]    | 37.2 [36.7,37.6]    | 37.1 [36.7,37.5]    | <0.001 |
| Potassium, median [Q1,Q3]                               |   | 4.2 [3.9,4.5]       | 4.2 [3.9,4.5]       | 4.2 [3.9,4.5]       | <0.001 |
| Sodium, median [Q1,Q3]                                  |   | 139.0 [137.0,142.0] | 141.0 [139.0,143.0] | 141.0 [138.0,143.0] | <0.001 |
| Lactate, median [Q1,Q3]                                 |   | 2.0 [1.6,2.4]       | 2.0 [1.7,2.4]       | 2.1 [1.7,2.6]       | <0.001 |
| Glucose, median [Q1,Q3]                                 |   | 129.0 [114.0,146.0] | 127.0 [110.0,147.0] | 130.0 [113.0,150.0] | <0.001 |
| WBC, median [Q1,Q3]                                     |   | 12.5 [9.5,16.2]     | 13.1 [10.1,16.6]    | 13.1 [10.4,16.7]    | <0.001 |
| MCH, median [Q1,Q3]                                     |   | 30.1 [28.9,31.3]    | 30.1 [29.1,31.2]    | 30.0 [28.9,31.1]    | 0.425  |
| MCHC, median [Q1,Q3]                                    |   | 33.5 [32.8,34.2]    | 33.6 [32.8,34.3]    | 33.6 [32.9,34.1]    | 0.385  |
| MCV, median [Q1,Q3]                                     |   | 89.7 [86.2,93.0]    | 89.6 [86.6,92.9]    | 89.4 [86.1,92.7]    | 0.17   |
| Platelets, median [Q1,Q3]                               |   | 138.0 [110.0,172.0] | 135.0 [107.0,169.0] | 144.0 [113.0,181.0] | <0.001 |
| RBC, median [Q1,Q3]                                     |   | 3.5 [3.1,3.9]       | 3.4 [3.0,3.8]       | 3.3 [3.0,3.8]       | <0.001 |
| RDW, median [Q1,Q3]                                     |   | 14.2 [13.4,15.2]    | 14.3 [13.5,15.3]    | 14.2 [13.5,15.4]    | <0.001 |
| Anion Gap, median [Q1,Q3]                               |   | 8.0 [6.0,11.5]      | 10.3 [8.0,13.0]     | 8.0 [6.0,10.0]      | <0.001 |
| BUN, median [Q1,Q3]                                     |   | 16.0 [13.0,22.0]    | 17.0 [13.0,22.0]    | 17.0 [13.0,22.0]    | 0.002  |
| Creatinine, median [Q1,Q3]                              |   | 1.0 [0.8,1.3]       | 1.0 [0.8,1.2]       | 1.0 [0.8,1.2]       | 0.294  |
| Fibrinogen, median [Q1,Q3]                              |   | 241.0 [193.0,306.2] | 241.0 [197.8,299.2] | 210.0 [173.0,270.0] | <0.001 |
| INR, median [Q1,Q3]                                     |   | 1.2 [1.1,1.3]       | 1.4 [1.2,1.5]       | 1.2 [1.1,1.4]       | <0.001 |
| PT, median [Q1,Q3]                                      |   | 13.5 [11.9,15.8]    | 16.5 [15.2,17.9]    | 13.4 [12.1,16.1]    | <0.001 |
| PTT, median [Q1,Q3]                                     |   | 30.5 [27.4,34.9]    | 34.9 [31.0,40.0]    | 31.7 [28.4,35.3]    | <0.001 |
| Heart Rate, median [Q1,Q3]                              |   | 80.0 [73.0,90.0]    | 81.0 [73.0,91.0]    | 86.0 [77.0,93.0]    | <0.001 |
| SBP, median [Q1,Q3]                                     |   | 116.0 [104.0,130.0] | 114.0 [103.0,127.0] | 115.0 [104.0,128.0] | <0.001 |
| DBP, median [Q1,Q3]                                     |   | 55.0 [48.0,62.0]    | 54.0 [48.0,61.0]    | 55.0 [49.0,62.0]    | <0.001 |
| MBP, median [Q1,Q3]                                     |   | 74.0 [67.0,82.0]    | 73.0 [66.0,80.0]    | 74.0 [67.0,81.0]    | <0.001 |
| Respiratory Rate, median [Q1,Q3]                        |   | 17.0 [14.0,21.0]    | 17.0 [14.0,21.0]    | 18.0 [14.0,22.0]    | <0.001 |
| SpO <sub>2</sub> , median [Q1,Q3]                       |   | 98.0 [96.0,100.0]   | 98.0 [96.0,100.0]   | 98.0 [96.0,100.0]   | <0.001 |
| 24h SOFA Score, median [Q1,Q3]                          |   | 3.0 [1.0,5.0]       | 4.0 [1.0,5.0]       | 6.0 [4.0,8.0]       | <0.001 |
| Elixhauser, median [Q1,Q3]                              |   | 1.0 [0.0,2.0]       | 0.0 [0.0,1.0]       | 0.0 [0.0,2.0]       | <0.001 |
| Invasive Ventilation in Hour, median [Q1,Q3]            | 0 | 19056 (27.9)        | 4507 (10.9)         | 1039 (7.0)          | <0.001 |
|                                                         | 1 | 49358 (72.1)        | 36771 (89.1)        | 13769 (93.0)        |        |
| Minutes on Ventilator Within Hour, median [Q1,Q3]       |   | 60.0 [0.0,60.0]     | 60.0 [60.0,60.0]    | 60.0 [60.0,60.0]    | <0.001 |



|                                                  |  |               |               |               |        |
|--------------------------------------------------|--|---------------|---------------|---------------|--------|
| <b>Dopamine Amount, median<br/>[Q1,Q3]</b>       |  | 0.0 [0.0,0.0] | 0.0 [0.0,0.0] | 0.0 [0.0,0.0] | <0.001 |
| <b>Epinephrine Amount, median<br/>[Q1,Q3]</b>    |  | 0.0 [0.0,0.0] | 0.0 [0.0,0.0] | 0.0 [0.0,0.0] | <0.001 |
| <b>Norepinephrine Amount, median<br/>[Q1,Q3]</b> |  | 0.0 [0.0,0.0] | 0.0 [0.0,0.0] | 0.4 [0.0,3.5] | <0.001 |
| <b>Phenylephrine Amount, median<br/>[Q1,Q3]</b>  |  | 0.0 [0.0,0.0] | 0.0 [0.0,0.0] | 0.0 [0.0,0.0] | <0.001 |
| <b>Vasopressin Amount, median<br/>[Q1,Q3]</b>    |  | 0.0 [0.0,0.0] | 0.0 [0.0,0.0] | 0.0 [0.0,0.0] | <0.001 |
| <b>Amiodarone Amount, median<br/>[Q1,Q3]</b>     |  | 0.0 [0.0,0.0] | 0.0 [0.0,0.0] | 0.0 [0.0,0.0] | <0.001 |
| <b>Clevidipine Amount, median<br/>[Q1,Q3]</b>    |  | 0.0 [0.0,0.0] | 0.0 [0.0,0.0] | 0.0 [0.0,0.0] | <0.001 |
| <b>Dobutamine Amount, median<br/>[Q1,Q3]</b>     |  | 0.0 [0.0,0.0] | 0.0 [0.0,0.0] | 0.0 [0.0,0.0] | <0.001 |
| <b>Milrinone Amount, median<br/>[Q1,Q3]</b>      |  | 0.0 [0.0,0.0] | 0.0 [0.0,0.0] | 0.0 [0.0,0.0] | <0.001 |
| <b>Nicardipine Amount, median<br/>[Q1,Q3]</b>    |  | 0.0 [0.0,0.0] | 0.0 [0.0,0.0] | 0.0 [0.0,0.0] | <0.001 |

**Supplemental Table 3. ICD-9-PCS and ICD-10-PCS codes.** Table of codes used to identify CABG, valve repair, and valve replacement procedures.

| Category                 | Code   | Translation                                                     |
|--------------------------|--------|-----------------------------------------------------------------|
| CABG                     | 361X   | Aortocoronary Bypass for Heart Revascularization                |
|                          | 2100X  | Coronary Artery, One Artery                                     |
|                          | 2110X  | Coronary Artery, Two Arteries                                   |
|                          | 2120X  | Coronary Artery, Three Arteries                                 |
|                          | 2130X  | Coronary Artery, Four or More Arteries                          |
| Valve Repair/Replacement | 352X   | Open and other replacement of unspecified heart valve           |
|                          | 3511   | Open heart valvuloplasty of aortic valve without replacement    |
|                          | 3512   | Open heart valvuloplasty of mitral valve without replacement    |
|                          | 3513   | Open heart valvuloplasty of pulmonary valve without replacement |
|                          | 3514   | Open heart valvuloplasty of tricuspid valve without replacement |
|                          | 02RF0X | Replacement, Aortic Valve                                       |
|                          | 02RG0X | Replacement, Tricuspid Valve                                    |
|                          | 02RH0X | Replacement, Pulmonary Valve                                    |
|                          | 02RJ0X | Replacement, Tricuspid Valve                                    |
|                          | 02QF0X | Repair, Aortic Valve                                            |
|                          | 02QG0X | Repair, Mitral Valve                                            |
|                          | 02QH0X | Repair, Pulmonary Valve                                         |
|                          | 02QJ0X | Repair, Tricuspid Valve                                         |

**Supplementary Table 4. Admission diagnosis reasons.** Admission diagnosis reasons used in eICU-CRD in the absence of available ICD-9-PCS and ICD-10-PCS to identify post-cardiac surgery patient.

| Category | String                                                                                                                                |
|----------|---------------------------------------------------------------------------------------------------------------------------------------|
| CABG     | admission diagnosis All Diagnosis Operative Diagnosis Cardiovascular CABG, minimally invasive; mid-CABG                               |
|          | admission diagnosis All Diagnosis Operative Diagnosis Cardiovascular CABG alone, coronary artery bypass grafting                      |
|          | admission diagnosis All Diagnosis Operative Diagnosis Cardiovascular CABG alone, redo                                                 |
|          | admission diagnosis All Diagnosis Operative Diagnosis Cardiovascular CABG redo with other operation                                   |
| Valve    | admission diagnosis All Diagnosis Operative Diagnosis Cardiovascular Pulmonary valve surgery                                          |
|          | admission diagnosis All Diagnosis Operative Diagnosis Cardiovascular Aortic valve replacement (isolated)                              |
|          | admission diagnosis All Diagnosis Operative Diagnosis Cardiovascular Mitral valve repair                                              |
|          | admission diagnosis All Diagnosis Operative Diagnosis Cardiovascular Aortic and Mitral valve replacement                              |
|          | admission diagnosis All Diagnosis Operative Diagnosis Cardiovascular Mitral valve replacement                                         |
|          | admission diagnosis All Diagnosis Operative Diagnosis Cardiovascular Tricuspid valve surgery                                          |
| Both     | admission diagnosis All Diagnosis Operative Diagnosis Cardiovascular CABG redo with valve repair/replacement                          |
|          | admission diagnosis All Diagnosis Operative Diagnosis Cardiovascular CABG with pulmonic or tricuspid valve repair or replacement ONLY |
|          | admission diagnosis All Diagnosis Operative Diagnosis Cardiovascular CABG with double valve repair/replacement                        |
|          | admission diagnosis All Diagnosis Operative Diagnosis Cardiovascular CABG with mitral valve replacement                               |
|          | admission diagnosis All Diagnosis Operative Diagnosis Cardiovascular CABG with aortic valve replacement                               |
|          | admission diagnosis All Diagnosis Operative Diagnosis Cardiovascular CABG with mitral valve repair                                    |
